# Supplementary material for: Nutrient Content of Squeeze Pouch Foods for Infants and Toddlers Sold in the United States in 2015
Source: MDPI journal article supplement (doi:10.3390/nu11071689), 2019-07-23
Supplement: s1 [file s1]

## Web Supplement

### Product Classification

We classified the 703 eligible products into five mutually exclusive food categories (protein-based, yogurt- or milk-based, fruits and vegetables, fruit-based, and vegetable-based) based on the full ingredient list of the product. Because many products consisted of mixtures of ingredients, we assigned categories in a hierarchical manner. First, products containing any meat (e.g., beef), fish (e.g., salmon), or legumes (e.g., chickpeas) were assigned to meat-, fish-, or legume-based. If a product did not fall into this category, we continued down the hierarchy of possible food categories. Second, remaining products consisting of yogurts, custards, and puddings were assigned to yogurt- or milk-based. Products containing cheese or butter in a mixture of food categories (e.g., macaroni and cheese with vegetables) were not included in this category in the main analyses. Third, remaining products consisting of a mixture of pureed fruits and vegetables were assigned to fruits and vegetables. Products in this category could also contain grains. Fourth, remaining products consisting of only pureed fruits, or fruits plus grains (e.g., oatmeal), were assigned to fruit-based. Fifth, remaining products consisting of only pureed vegetables, or vegetables plus grains (e.g., pasta with vegetables), were assigned to vegetable-based.

Two authors (JB, MB) independently reviewed the full ingredient list of each product and assigned it a food category. Discrepancies in coding were identified ( $n = 7$ ) and resolved via discussion. In six cases of discrepancies, one of the authors had incorrectly coded the product due to overlooking a certain ingredient; these instances were corrected by reviewing the product classification scheme. In the final case of discrepancy, a product containing coconut milk and fruit puree was classified by one author as fruit-based and by the other as yogurt- or milk-based. After discussion, the reviewers decided that the product was intended to be a yogurt-based puree, although it was non-dairy due to the inclusion of coconut milk instead of cow's milk.

**Table S1.** Inclusion and exclusion of products for analytic sample ( $n = 1,037$ ).

| Products, by packaging type                                                                                                                                                       | Total, $n$ | Included, $n$ | Excluded, $n$ |
|-----------------------------------------------------------------------------------------------------------------------------------------------------------------------------------|------------|---------------|---------------|
| Total                                                                                                                                                                             | 1037       | 703           | 334           |
| Bag products (e.g., crisps, biscuits, puffs, ravioli)                                                                                                                             | 16         | 0             | 16            |
| Box products (e.g., meal bowls, cereal packets, cookies, pizza, nutrition bar, rice biscuits, pancakes/waffles, grain-based dinner packets)                                       | 89         | 0             | 89            |
| Can products (e.g., soup, pasta)                                                                                                                                                  | 5          | 0             | 5             |
| Glass jar products (e.g., pureed ready-to-serve foods, meat sticks, soup). Included all except meat sticks and soup.                                                              | 216        | 211           | 5             |
| Juice box products (e.g., smoothie, juice)                                                                                                                                        | 4          | 0             | 4             |
| Plastic bottle products (e.g., juice, yogurt drinks)                                                                                                                              | 23         | 0             | 23            |
| Plastic bowl products (e.g., hot cereal)                                                                                                                                          | 4          | 0             | 4             |
| Plastic box products (e.g., teething wafers)                                                                                                                                      | 2          | 0             | 2             |
| Plastic container products (e.g., cereal, oatmeal, baby cereal, crunchy snacks, crisps, puffs, yogurt, fruit and cereal purees. Yogurts and purees included, all others excluded. | 90         | 19            | 71            |

|                                                                                                                                                                                                              |     |     |    |
|--------------------------------------------------------------------------------------------------------------------------------------------------------------------------------------------------------------|-----|-----|----|
| Plastic pack products (e.g., pureed vegetables, pureed mixed dinners, yogurt, pureed fruits). Included all except Lil' Bits products (contain small soft pieces of food intended to help baby learn to chew) | 80  | 71  | 9  |
| Pouch products (e.g., baby cereal, cereal bars, rice cake, dried vegetables, crackers, twists, cookies, freeze dried yogurt snacks, tiny fruits, add-water meals)                                            | 75  | 5   | 70 |
| Squeeze pouch products (e.g., pureed, ready-to-serve foods)                                                                                                                                                  | 397 | 397 | 0  |
| Tray products (e.g., prepared meals, fruit pick-ups)                                                                                                                                                         | 36  | 0   | 36 |

**Table S2.** Comparison of macro- and micronutrient composition between squeeze pouch and other packaging, including only brands with both squeeze pouch and other products ( $n = 466$ ).

| Nutritional component                  | Squeeze pouch |                | Other packaging |                | p       |
|----------------------------------------|---------------|----------------|-----------------|----------------|---------|
|                                        | Median        | IQR            | Median          | IQR            |         |
| <i>Meat-, fish-, or legume-based</i>   |               |                |                 |                |         |
| Serving size, g                        | 99.0          | (99.0, 127.0)  | 113.0           | (99.0, 170.0)  | 0.2214  |
| Calories (Kcal/100 g)                  | 55.1          | (50.5, 70.7)   | 70.7            | (61.9, 88.2)   | 0.0085* |
| Fat (g/100g)                           | 1.0           | (0.0, 2.0)     | 1.8             | (0.9, 3.0)     | 0.0013* |
| Protein (g/100g)                       | 3.0           | (2.0, 3.1)     | 2.4             | (1.8, 3.2)     | 0.2905  |
| Carbohydrates (g/100g)                 | 9.1           | (8.1, 11.1)    | 10.1            | (8.0, 12.9)    | 0.6074  |
| Fiber (g/100g)                         | 2.0           | (1.6, 2.0)     | 1.1             | (0.6, 1.8)     | 0.0041* |
| Sugar (g/100g)                         | 2.4           | (1.6, 3.0)     | 2.9             | (1.7, 4.0)     | 0.3605  |
| Sodium (mg/100g)                       | 15.2          | (10.1, 23.6)   | 29.4            | (16.7, 39.8)   | 0.0260  |
| Vitamin A (mcg/100g)                   | 413.4         | (151.5, 681.8) | 796.5           | (50.0, 1991.2) | 0.2059  |
| Vitamin C (mcg/100g)                   | 0.0           | (0.0, 0.0)     | 0.0             | (0.0, 0.6)     | 0.6028  |
| Calcium (mg/100g)                      | 24.2          | (12.1, 37.8)   | 12.4            | (10.6, 21.2)   | 0.0121* |
| Iron (mg/100g)                         | 0.6           | (0.6, 0.9)     | 0.5             | (0.3, 0.7)     | 0.0279  |
| Contained added sugar (%) <sup>1</sup> | 0.0%          | (0.0%, 21.8%)  | 3.2%            | (0.4%, 11.0%)  | 0.4845  |
| <i>Yogurt- or milk-based</i>           |               |                |                 |                |         |
| Serving size, g                        | 107.0         | (105.0, 120.0) | 113.0           | (99.0, 113.0)  | 0.0309  |
| Calories (Kcal/100 g)                  | 88.8          | (66.7, 101.0)  | 97.3            | (88.5, 101.0)  | 0.1087  |
| Fat (g/100g)                           | 1.2           | (0.4, 2.0)     | 3.0             | (3.0, 3.5)     | <.0001* |
| Protein (g/100g)                       | 1.9           | (0.8, 2.0)     | 3.0             | (3.0, 3.5)     | 0.0002* |
| Carbohydrates (g/100g)                 | 16.3          | (14.2, 18.3)   | 14.7            | (12.4, 16.2)   | 0.0271  |
| Fiber (g/100g)                         | 0.8           | (0.0, 1.2)     | 0.0             | (0.0, 0.4)     | 0.001*  |
| Sugar (g/100g)                         | 12.3          | (11.4, 13.3)   | 11.5            | (10.6, 12.1)   | 0.0057* |
| Sodium (mg/100g)                       | 25.0          | (12.5, 35.4)   | 53.1            | (47.4, 55.6)   | <.0001* |
| Vitamin A (mcg/100g)                   | 79.2          | (30.3, 166.7)  | 213.2           | (132.7, 239.9) | 0.0013* |
| Vitamin C (mcg/100g)                   | 10.0          | (0.7, 20.0)    | 0.0             | (0.0, 0.0)     | <.0001* |
| Calcium (mg/100g)                      | 90.9          | (59.8, 152.4)  | 106.2           | (90.9, 132.7)  | 0.8424  |
| Iron (mg/100g)                         | 0.1           | (0.0, 0.3)     | 0.0             | (0.0, 0.0)     | 0.0088* |
| Contained added sugar (%) <sup>1</sup> | 73.5%         | (55.6%, 87.1%) | 78.6%           | (59.1%, 91.7%) | 0.6446  |
| <i>Fruits and vegetables</i>           |               |                |                 |                |         |
| Serving size, g                        | 113.0         | (99.0, 113.0)  | 60.0            | (60.0, 113.0)  | <.0001* |
| Calories (Kcal/100 g)                  | 59.5          | (50.3, 66.0)   | 58.3            | (50.0, 64.3)   | 0.3218  |
| Fat (g/100g)                           | 0.0           | (0.0, 0.0)     | 0.0             | (0.0, 0.0)     | 0.2429  |

|                                        |       |                 |        |                 |         |
|----------------------------------------|-------|-----------------|--------|-----------------|---------|
| Protein (g/100g)                       | 0.4   | (0.0, 0.9)      | 0.0    | (0.0, 0.4)      | 0.0033* |
| Carbohydrates (g/100g)                 | 13.3  | (12.1, 15.0)    | 13.3   | (11.4, 13.3)    | 0.2432  |
| Fiber (g/100g)                         | 1.8   | (0.9, 2.0)      | 1.7    | (1.7, 2.5)      | 0.3592  |
| Sugar (g/100g)                         | 10.0  | (7.5, 10.8)     | 8.3    | (6.7, 10.0)     | 0.0391  |
| Sodium (mg/100g)                       | 9.1   | (4.4, 17.2)     | 2.2    | (0.0, 16.7)     | 0.0192  |
| Vitamin A (mcg/100g)                   | 353.4 | (123.1, 1051.1) | 615.5  | (50.0, 1413.7)  | 0.6702  |
| Vitamin C (mcg/100g)                   | 11.2  | (0.0, 15.9)     | 0.0    | (0.0, 1.0)      | <.0001* |
| Calcium (mg/100g)                      | 10.6  | (0.0, 12.1)     | 20.0   | (5.0, 20.0)     | 0.0055* |
| Iron (mg/100g)                         | 0.3   | (0.0, 0.5)      | 0.5    | (0.3, 0.5)      | 0.0690  |
| Contained added sugar (%) <sup>1</sup> | 31.8% | (18.6%, 47.6%)  | 33.3%  | (18.6%, 51.0%)  | 0.8855  |
| <i>Fruit-based</i>                     |       |                 |        |                 |         |
| Serving size, g                        | 99.0  | (99.0, 113.0)   | 113.0  | (99.0, 113.0)   | 0.4196  |
| Calories (Kcal/100 g)                  | 66.7  | (58.3, 80.8)    | 64.7   | (56.3, 79.6)    | 0.7962  |
| Fat (g/100g)                           | 0.0   | (0.0, 0.0)      | 0.0    | (0.0, 0.0)      | 0.6177  |
| Protein (g/100g)                       | 0.5   | (0.4, 0.9)      | 0.3    | (0.0, 0.9)      | 0.0450  |
| Carbohydrates (g/100g)                 | 15.6  | (13.3, 17.7)    | 15.0   | (13.3, 18.2)    | 0.5178  |
| Fiber (g/100g)                         | 1.7   | (1.0, 2.0)      | 1.7    | (0.9, 2.4)      | 0.8080  |
| Sugar (g/100g)                         | 11.9  | (10.8, 12.9)    | 10.6   | (9.7, 13.1)     | 0.0082* |
| Sodium (mg/100g)                       | 4.2   | (0.0, 5.1)      | 4.4    | (0.0, 7.0)      | 0.0709  |
| Vitamin A (mcg/100g)                   | 48.0  | (0.0, 202.0)    | 0.0    | (0.0, 106.2)    | 0.0269  |
| Vitamin C (mcg/100g)                   | 13.9  | (4.0, 18.2)     | 13.9   | (9.3, 13.9)     | 0.4437  |
| Calcium (mg/100g)                      | 0.0   | (0.0, 10.6)     | 0.0    | (0.0, 10.6)     | 0.3654  |
| Iron (mg/100g)                         | 0.3   | (0.0, 0.3)      | 0.2    | (0.0, 0.5)      | 0.7522  |
| Contained added sugar (%) <sup>1</sup> | 29.6% | (18.0%, 43.6%)  | 15.0%  | (8.8%, 23.1%)   | 0.0276† |
| <i>Vegetable-based</i>                 |       |                 |        |                 |         |
| Serving size, g                        | 99.0  | (99.0, 99.0)    | 113.0  | (71.0, 113.0)   | 0.3068  |
| Calories (Kcal/100 g)                  | 45.5  | (35.4, 60.6)    | 48.2   | (35.4, 65.7)    | 0.3957  |
| Fat (g/100g)                           | 0.0   | (0.0, 0.5)      | 0.0    | (0.0, 0.0)      | 0.3976  |
| Protein (g/100g)                       | 1.0   | (0.5, 1.1)      | 1.0    | (0.6, 1.7)      | 0.9706  |
| Carbohydrates (g/100g)                 | 8.1   | (6.7, 9.4)      | 8.8    | (7.1, 13.3)     | 0.1891  |
| Fiber (g/100g)                         | 1.0   | (1.0, 1.1)      | 1.7    | (1.0, 1.9)      | 0.0134* |
| Sugar (g/100g)                         | 4.4   | (2.0, 5.1)      | 4.0    | (2.7, 5.8)      | 0.6644  |
| Sodium (mg/100g)                       | 20.2  | (15.2, 55.6)    | 20.4   | (6.5, 35.4)     | 0.1827  |
| Vitamin A (mcg/100g)                   | 378.8 | (378.8, 1818.2) | 1460.2 | (290.8, 4387.2) | 0.1269  |
| Vitamin C (mcg/100g)                   | 0.0   | (0.0, 15.9)     | 0.0    | (0.0, 0.0)      | 0.0331  |
| Calcium (mg/100g)                      | 24.2  | (12.1, 26.7)    | 21.2   | (12.1, 30.9)    | 0.6457  |
| Iron (mg/100g)                         | 0.3   | (0.2, 0.3)      | 0.4    | (0.3, 0.5)      | 0.4564  |
| Contained added sugar (%) <sup>1</sup> | 0.0%  | (0.0%, 5.0%)    | 0.0%   | (0.0%, 24.7%)   | N/A‡    |

IQR = Interquartile range. <sup>1</sup> Percent (%) and 95% confidence interval are presented for containing added sugar. \* Statistically significant at  $q = 0.05$  using Benjamini-Hochberg procedure for multiple testing based on 60 comparisons. p-value derived from Wilcoxon Rank-Sum test. † Statistically significant at  $\alpha = 0.05$ . p-value derived from chi-square test. ‡ Chi-square test not conducted because no vegetable-based products contained added sugars.
